# Supplementary material
Source: Frontiers journal article supplement (https://www.frontiersin.org/articles/405033)
Supplement: Table_3.PDF [file Table_3.PDF]

**Table S3. Aerodynamic inputs for simulation.** Horizontal and vertical aerodynamic forces applied to brachial (B), antebrachial (A), and manual (M) wing segments for each model. Values are based on wing-assisted incline running on 65° inclines (data from (Heers et al., 2011)); colors match colors of wing segments in Figure 3.

| Age                  |   | Total aerodynamic force |           | Coefficient of resultant force, 45° angle of attack ( $C_R$ ) | Angle of force (deg from horizontal) | Surface area of wing segment ( $S$ ; m <sup>2</sup> ) | Distance btwn center of wing segment and shoulder jt ( $r$ ; m) | Angular velocity ( $\Omega$ ; radians) | Translational velocity ( $V_T$ ; m/s) | Proportion of total force $\frac{F}{S[(\Omega r)^2 + V_T^2]}$ | Total force (N) | Horizontal force (N) | Vertical force (N) |
|----------------------|---|-------------------------|-----------|---------------------------------------------------------------|--------------------------------------|-------------------------------------------------------|-----------------------------------------------------------------|----------------------------------------|---------------------------------------|---------------------------------------------------------------|-----------------|----------------------|--------------------|
|                      |   | 2 wings, % body wt      | 1 wing, N |                                                               |                                      |                                                       |                                                                 |                                        |                                       |                                                               |                 |                      |                    |
| Baby: 7-8 days       | B |                         |           |                                                               |                                      | 1.87E-04                                              | 7.30E-03                                                        |                                        |                                       | 0.012                                                         | 1.82E-04        | 5.63E-05             | 1.73E-04           |
|                      | A | 8.68                    | 1.47E-02  | 1.69                                                          | 72                                   | 7.10E-04                                              | 1.93E-02                                                        | 68.80                                  | 0.62                                  | 0.158                                                         | 2.33E-03        | 7.21E-04             | 2.22E-03           |
|                      | M |                         |           |                                                               |                                      | 7.27E-04                                              | 4.73E-02                                                        |                                        |                                       | 0.829                                                         | 1.22E-02        | 3.78E-03             | 1.16E-02           |
| Juvenile: 18-20 days | B |                         |           |                                                               |                                      | 9.50E-04                                              | 1.06E-02                                                        |                                        |                                       | 0.013                                                         | 1.63E-03        | 8.16E-04             | 1.41E-03           |
|                      | A | 31.15                   | 1.30E-01  | 1.40                                                          | 60                                   | 3.55E-03                                              | 3.93E-02                                                        | 66.29                                  | 1.18                                  | 0.204                                                         | 2.64E-02        | 1.32E-02             | 2.28E-02           |
|                      | M |                         |           |                                                               |                                      | 2.83E-03                                              | 9.30E-02                                                        |                                        |                                       | 0.784                                                         | 1.02E-01        | 5.08E-02             | 8.80E-02           |
| Adult: >100 days     | B |                         |           |                                                               |                                      | 3.24E-03                                              | 2.39E-02                                                        |                                        |                                       | 0.015                                                         | 2.22E-02        | 1.21E-02             | 1.86E-02           |
|                      | A | 60.48                   | 1.48E+00  | 1.97                                                          | 57                                   | 8.23E-03                                              | 7.27E-02                                                        | 60.95                                  | 1.57                                  | 0.182                                                         | 2.71E-01        | 1.47E-01             | 2.27E-01           |
|                      | M |                         |           |                                                               |                                      | 9.63E-03                                              | 1.47E-01                                                        |                                        |                                       | 0.803                                                         | 1.19E+00        | 6.48E-01             | 9.98E-01           |
